# Supplementary material for: Sodium ion battery anode properties of designed graphene-layers synthesized from polycyclic aromatic hydrocarbons
Source: Royal Society of Chemistry journal article supplement (doi:10.1039/c6ra00955g), 2016-01-01
Supplement: c6ra00955g1.pdf [file c6ra00955g1.pdf]

Electronic Supplementary Information

## Sodium ion battery anode properties of designed graphene-layers synthesized from polycyclic aromatic hydrocarbons

Taichi Hayakawa, Yosuke Ishii\*, and Shinji Kawasaki\*

Department of Materials Science and Engineering, Nagoya Institute of Technology, Gokiso-cho,

Showa-ku, Nagoya 466-8555, Japan

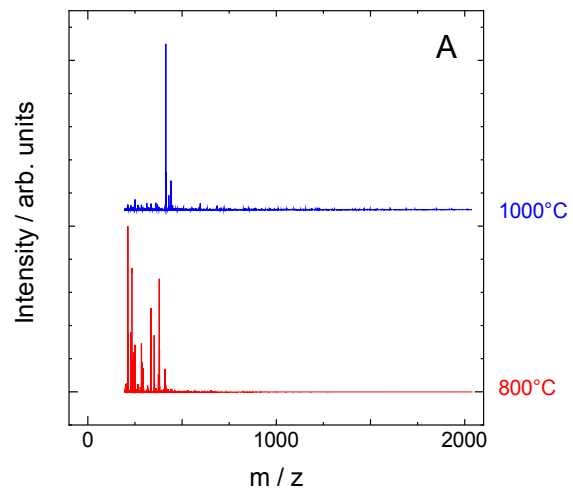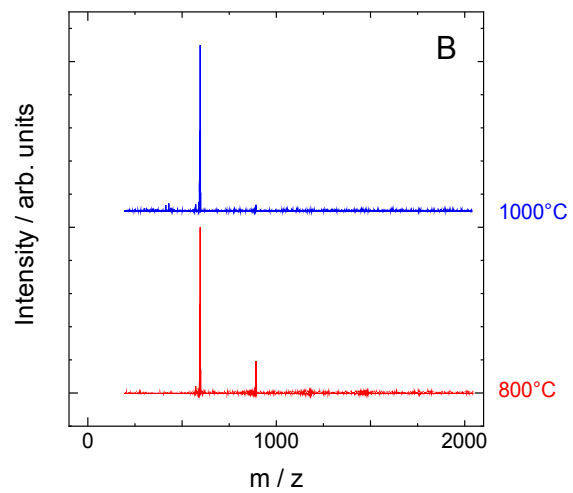

**Figure S1.** LDI-TOF-Mass spectra of heat-treated (A) pentacene and (B) coronene samples.

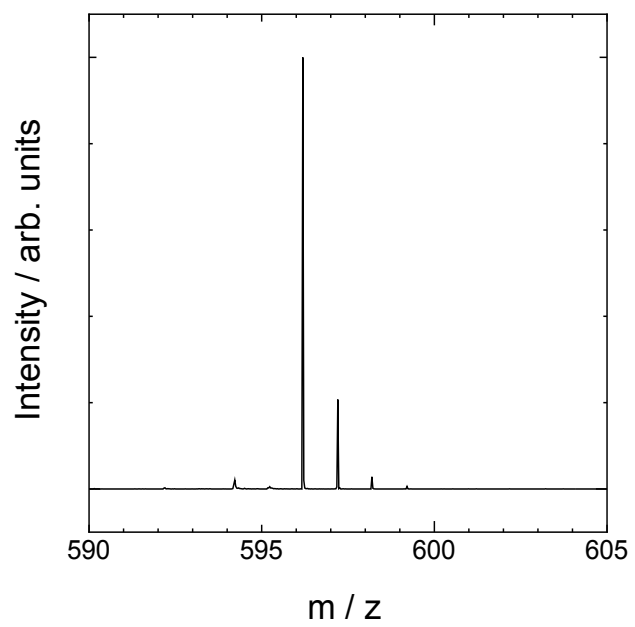

**Figure S2.** LDI-TOF-Mass spectra of the obtained dicoronylene sample.

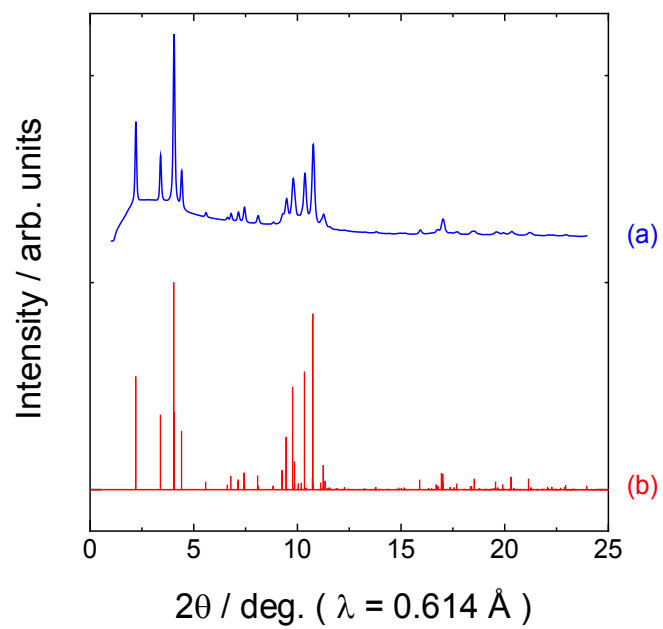

**Figure S3.** (a) observed and (b) simulated XRD diffraction patterns of dicoronylene.

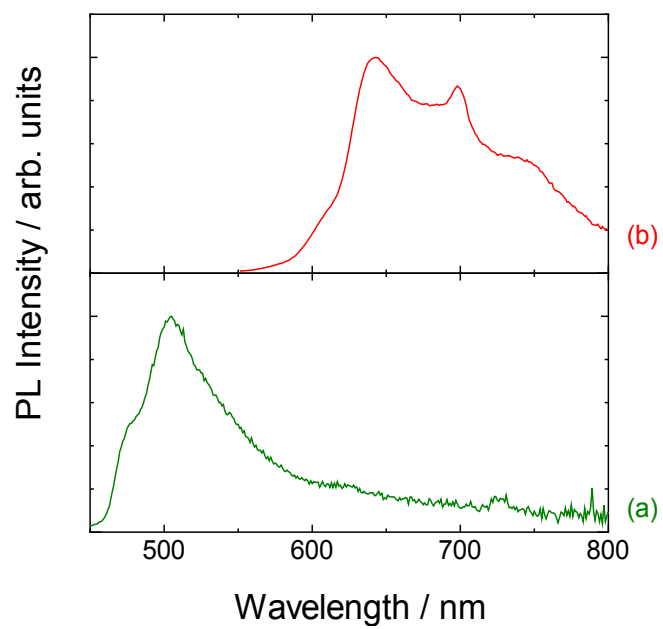

**Figure S4.** Photoluminescence spectra of (a) coronene and (b) dicoronylene sample.
